# Supplementary material for: The Effect of Nutrition on Aging—A Systematic Review Focusing on Aging-Related Biomarkers
Source: MDPI journal article supplement (doi:10.3390/nu14030554), 2022-01-27
Supplement: s1 [file s1]

**Table S1** – Quality assessment of the included studies.

| Author (year)                                      | Allocation of study groups | Unit of allocation | Baseline differences | Objectivity of the outcome | Completeness of follow-up | Total score |
|----------------------------------------------------|----------------------------|--------------------|----------------------|----------------------------|---------------------------|-------------|
| Alonso-Pedrero, Lucia et al., 2020 [32]            | 1                          | 0                  | 2                    | 2                          | 1                         | 6           |
| Baba, Yoshitake et al., 2020 [33]                  | 2                          | 2                  | 1                    | 0                          | 2                         | 7           |
| Fernández-Real, José Manuel et al., 2012 [34]      | 2                          | 1                  | 2                    | 1                          | 2                         | 8           |
| Fortin, A. et al., 2018 [35]                       | 2                          | 1                  | 1                    | 1                          | 2                         | 7           |
| Fretts, Amanda M. et al., 2016 [36]                | 0                          | 1                  | 2                    | 2                          | 0                         | 5           |
| García-Calzón, Sonia et al., 2015 [37]             | 2                          | 1                  | 2                    | 1                          | 2                         | 8           |
| González-Guardia, Lorena et al., 2015 [38]         | 2                          | 0                  | 1                    | 0                          | 0                         | 3           |
| Gu, Yian et al., 2015 [39]                         | 1                          | 1                  | 2                    | 2                          | 1                         | 7           |
| Guallar-Castillón, Pilar et al., 2012 [40]         | 1                          | 1                  | 2                    | 1                          | 2                         | 7           |
| Gutierrez-Mariscal, Francisco M. et al., 2012 [41] | 2                          | 1                  | 1                    | 0                          | 2                         | 6           |
| Gutierrez-Mariscal, Francisco M. et al., 2014 [42] | 2                          | 1                  | 1                    | 0                          | 2                         | 6           |
| Hernández, Álvaro et al., 2020 [43]                | 2                          | 2                  | 2                    | 0                          | 2                         | 8           |
| Becerra-Tomás, Nerea et al., 2021 [44]             | 1                          | 1                  | 2                    | 1                          | 2                         | 7           |
| Jalilpiran, Yahya et al., 2020 [45]                | 1                          | 2                  | 2                    | 1                          | 2                         | 8           |
| Kanerva, Noora et al., 2014 [46]                   | 2                          | 1                  | 2                    | 1                          | 0                         | 6           |
| Khalatbari-Soltani, Saman et al., 2020 [47]        | 1                          | 1                  | 2                    | 2                          | 0                         | 6           |
| Kondo, Keiko et al., 2014 [48]                     | 0                          | 2                  | 0                    | 1                          | 0                         | 3           |
| Martens, Remy J. H. et al., 2020 [49]              | 1                          | 2                  | 2                    | 1                          | 1                         | 7           |
| Martínez-Lapiscina, Elena H. et al., 2014 [50]     | 2                          | 2                  | 2                    | 2                          | 0                         | 8           |
| Mofrad, Manije D. et al., 2019 [51]                | 1                          | 1                  | 2                    | 1                          | 0                         | 5           |
| Mujica-Parodi, Lilianne R. et al., 2020 [52]       | 1                          | 0                  | 1                    | 0                          | 0                         | 2           |
| Neth, Bryan J. et al., 2020 [53]                   | 2                          | 1                  | 1                    | 1                          | 1                         | 6           |
| Paoli, Antonio et al., 2011 [54]                   | 0                          | 1                  | 1                    | 2                          | 1                         | 5           |
| Bhanpuri, Nasir H. et al., 2018 [55]               | 0                          | 1                  | 2                    | 0                          | 1                         | 4           |
| Schönknecht, Yannik B. et al., 2020 [56]           | 2                          | 1                  | 1                    | 0                          | 2                         | 6           |
| Song, Xiaoling et al., 2016 [57]                   | 2                          | 1                  | 2                    | 0                          | 2                         | 7           |

| Author (year)                              | Allocation of study groups | Unit of allocation | Baseline differences | Objectivity of the outcome | Completeness of follow-up | Total score   |
|--------------------------------------------|----------------------------|--------------------|----------------------|----------------------------|---------------------------|---------------|
| Tiainen, A-MK. et al., 2012 [58]           | 1                          | 0                  | 1                    | 0                          | 2                         | 4             |
| Uusitupa, M. et al., 2013 [59]             | 2                          | 2                  | 2                    | 2                          | 1                         | 9             |
| Yousefi, Reyhaneh et al., 2020 [60]        | 2                          | 1                  | 2                    | 2                          | 1                         | 8             |
| Yubero-Serrano, Elena M. et al., 2012 [61] | 2                          | 1                  | 1                    | 0                          | 2                         | 6             |
| Boccardi, Virginia et al., 2013 [62]       | 1                          | 1                  | 1                    | 0                          | 2                         | 5             |
| Bonaccio, Marialaura et al., 2021 [63]     | 0                          | 0                  | 2                    | 1                          | 2                         | 5             |
| Cassidy, Aedín et al., 2010 [64]           | 0                          | 0                  | 2                    | 0                          | 0                         | 2             |
| Chou, Yi-Chun et al., 2019 [65]            | 1                          | 2                  | 2                    | 0                          | 1                         | 6             |
| Crous-Bou, Marta et al., 2014 [66]         | 0                          | 0                  | 2                    | 2                          | 0                         | 4             |
| do Rosario, Vinicius A. et al., 2020 [67]  | 2                          | 1                  | 1                    | 2                          | 2                         | 8             |
|                                            |                            |                    |                      |                            |                           | <b>Median</b> |
|                                            |                            |                    |                      |                            |                           | 6             |
